# Supplementary material for: TRPV1 Contributes to Cerebral Malaria Severity and Mortality by Regulating Brain Inflammation
Source: Hindawi journal article supplement (doi:10.1155/2019/9451671), 2019-05-16
Supplement: f1 [file 9451671.f1.pdf]

**TRPV1 contributes to cerebral malaria severity and mortality by regulating brain inflammation**

Domingos Magno Santos Pereira<sup>1</sup>, Simone Aparecida Teixeira<sup>2</sup>, Oscar Murillo<sup>3</sup>, Erika Paula Machado Peixoto<sup>3</sup>, Mizael Calácio de Araújo<sup>1</sup>, Nágila Caroline Fialho Sousa<sup>1</sup>, Valério Monteiro-Neto<sup>1,4</sup>, João Batista Calixto<sup>5</sup>, Thiago Mattar Cunha<sup>6</sup>, Cláudio Romero Farias Marinho<sup>3</sup>, Marcelo Nicolás Muscará<sup>2</sup>, Elizabeth Soares Fernandes<sup>1\*</sup>

<sup>1</sup>Programa de Pós-graduação, Universidade CEUMA, São Luís, MA, Brazil;

<sup>2</sup>Departamento de Farmacologia, Instituto de Ciências Biomédicas, Universidade de São

Paulo, São Paulo, SP, Brazil; <sup>3</sup>Departamento de Parasitologia, Instituto de Ciências

Biomédicas, Universidade de São Paulo, São Paulo, SP, Brazil; <sup>4</sup>Centro de Ciências da

Saúde, Universidade Federal do Maranhão, São Luís, MA, Brazil; <sup>5</sup>Centro de Inovação

e Ensaios Pré-Clínicos-CIEnP, Florianópolis, SC, Brazil; <sup>6</sup>Departamento de

Farmacologia, Faculdade de Medicina de Ribeirão Preto, Universidade de São Paulo,

São Paulo, SP, Brazil

Running title: TRPV1 deletion attenuates cerebral malaria

#Address correspondence to Elizabeth S. Fernandes; [elizabeth.soares@ceuma.br](mailto:elizabeth.soares@ceuma.br)

Telephone number: +55 98 3214-4252

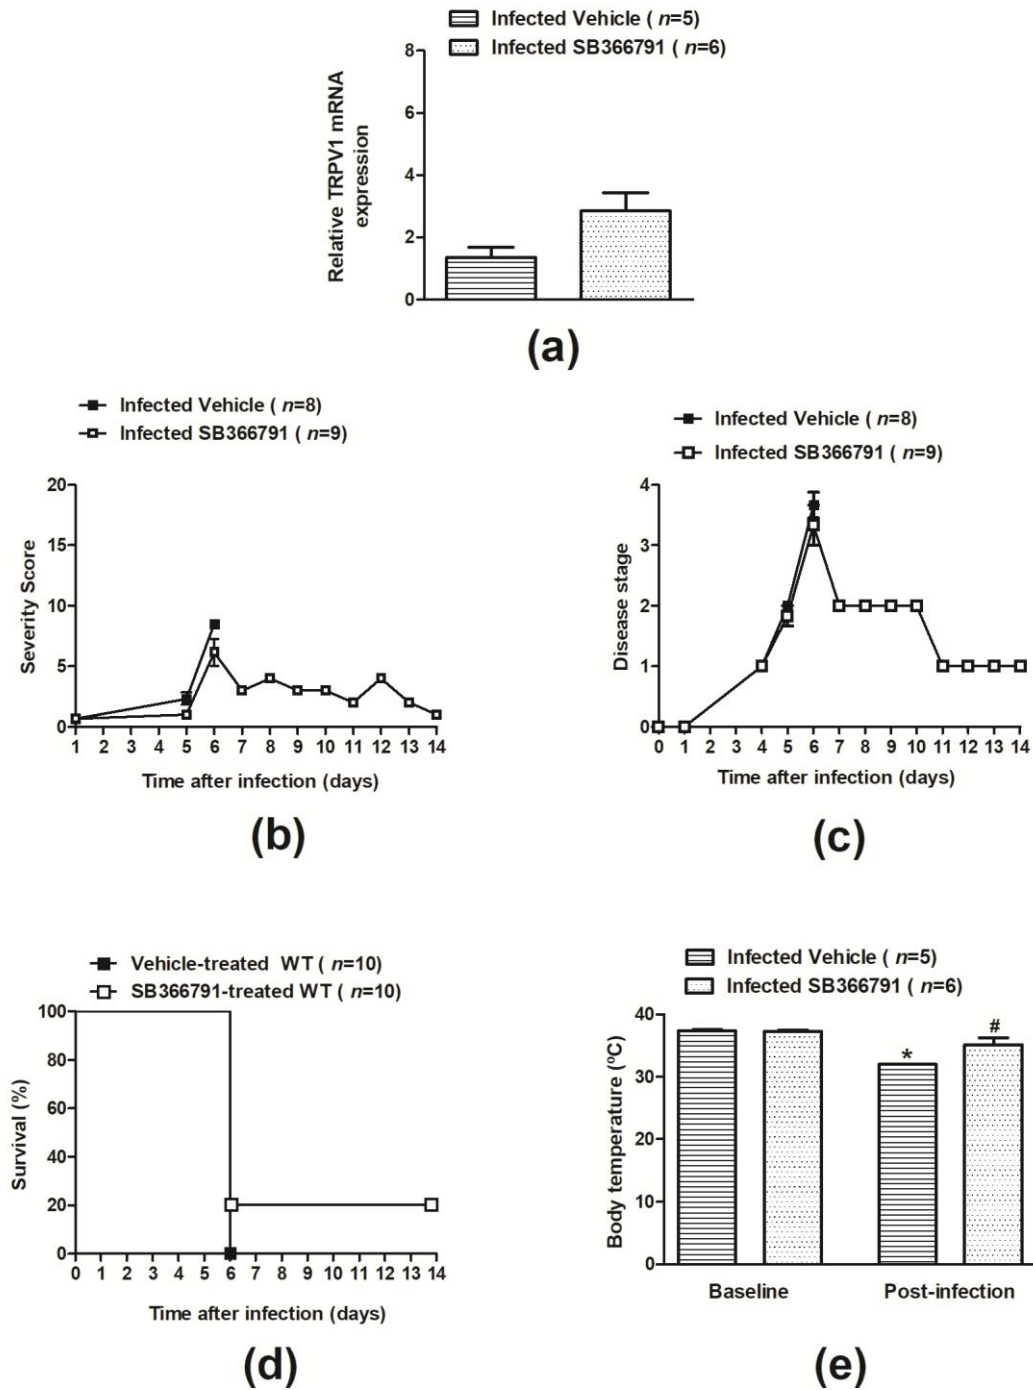

**Figure S1. Effect of the selective TRPV1 antagonist SB366791 in the brain expression of TRPV1 mRNA and in cerebral malaria progression.** (a) TRPV1 mRNA expression in brain samples of infected (at stage III/IV) TRPV1 wild type (WT) mice. Disease progression (b) and stage (c); survival rates (d) and body temperature (e) recordings from TRPV1 WT mice infected with *P. berghei* ANKA. Disease

progression, stage and survival rates were registered over 14-days post-infection. Mouse body temperatures were evaluated at baseline and post-malaria induction (at stage III/IV or at day 14<sup>th</sup> for those that survived the observation period). Mice received the TRPV1 antagonist SB366791 (0.5 mg/kg, s.c., twice a day) or vehicle (10% DMSO in saline), from 24h post-induction of malaria. Results represent the mean  $\pm$  SEM of all mice per group, obtained from two independent experiments. *n* is indicated on each graph. Data were analysed by repeated measures analysis of variance (ANOVA) followed by the Bonferroni test with FDR correction (panels b and c). Paired and unpaired *t* test were used when appropriate (panels a and e). Survival curves were analysed by the non-parametric Mantel-Cox test (panel d). \**p*<0.05, differs from baseline readings; #*p*<0.05, differs from infected WT mice treated with vehicle.
